# Supplementary material
Source: publisher figshare collection journal article supplement (https://asha.figshare.com/articles/dataset/_/23596797)
Supplement: Supplementary file 1 [file 1]

| Number | Author(s)             | Study Year | Study Title                                                                                                                                                                                                              | Country(s)   | Language(s)     | Age Group(s)                          | DLD group N | Identification Measure(s)                                                                                    | Modality    | Genre                                                                                                | General Writing Performance                                                                                                                                                                  | Spelling                                                                                                                                                                                                                                                                                                                                                      | Grammar                                                                                                            | Length & Complexity                                                                                                                                         | Writing Process (Rate, Organization, Planning)                                                                                                     | Oral vs. Written | Genre Comparison                                                                                                                                         | Issues with Writing Measures                                                                                                                         | Age-Matched TL Control Group | Language Age/Ability Match Group | Literacy Age/Ability Match Group |
|--------|-----------------------|------------|--------------------------------------------------------------------------------------------------------------------------------------------------------------------------------------------------------------------------|--------------|-----------------|---------------------------------------|-------------|--------------------------------------------------------------------------------------------------------------|-------------|------------------------------------------------------------------------------------------------------|----------------------------------------------------------------------------------------------------------------------------------------------------------------------------------------------|---------------------------------------------------------------------------------------------------------------------------------------------------------------------------------------------------------------------------------------------------------------------------------------------------------------------------------------------------------------|--------------------------------------------------------------------------------------------------------------------|-------------------------------------------------------------------------------------------------------------------------------------------------------------|----------------------------------------------------------------------------------------------------------------------------------------------------|------------------|----------------------------------------------------------------------------------------------------------------------------------------------------------|------------------------------------------------------------------------------------------------------------------------------------------------------|------------------------------|----------------------------------|----------------------------------|
| 46     | McCarthy et al        | 2012       | Is weak oral language associated with poor spelling in school-age children with specific language impairment, dyslexia or both?                                                                                          | USA          | English         | Children (4th grade)                  | 61          | Kindergarten diagnosis of SLI (TOLD-P-2; narrative); CELF-3                                                  | Handwritten | Single word spelling (TWS-3)                                                                         | N/A                                                                                                                                                                                          | Poorer spelling for children with SLI-dyslexia, but those with only SLI performed similar to those with TL; more orthographic spelling errors regardless of dyslexia comorbide                                                                                                                                                                                | N/A                                                                                                                | N/A                                                                                                                                                         | N/A                                                                                                                                                | N/A              | N/A                                                                                                                                                      | N/A                                                                                                                                                  | Yes                          | No                               | No                               |
| 47     | Vandewalle et al      | 2012       | Auditory processing and speech perception in children with specific language impairment: relations with oral language and literacy skills                                                                                | Belgium      | Dutch           | Children (1st & 3rd grade)            | 18          | Reynell Developmental Language Scales; Language Tests for Children; Schlichting Test for Language Production | Handwritten | Single word spelling                                                                                 | N/A                                                                                                                                                                                          | Poorer spelling in 1st and 3rd grade only for subgroup of children with SLI and concomitant literacy delay                                                                                                                                                                                                                                                    | N/A                                                                                                                | N/A                                                                                                                                                         | N/A                                                                                                                                                | N/A              | N/A                                                                                                                                                      | N/A                                                                                                                                                  | Yes                          | No                               | No                               |
| 48     | Broc et al            | 2013       | Lexical spelling in children and adolescents with specific language impairment: variations with the writing situation                                                                                                    | France       | French          | Children & Adolescents (7 - 18 years) | 24          | BILO2; N-EEL; BILO3C; LZMA                                                                                   | Handwritten | Single word spelling, pseudoword spelling, written narrative                                         | N/A                                                                                                                                                                                          | Poorer spelling of single words, pseudowords, and of words in narrative context; Children made more spelling errors than adolescents; DLD group made more phonologically implausible error                                                                                                                                                                    | N/A                                                                                                                | Fewer total words in narratives                                                                                                                             | N/A                                                                                                                                                | N/A              | Fewer spelling errors in narrative than single word spelling from dictation; more errors in pseudowords and irregular real words than regular real words | Yes                                                                                                                                                  | No                           | No                               |                                  |
| 49     | Williams et al        | 2013       | Written language skills in children with specific language impairment                                                                                                                                                    | UK           | English         | Children & Adolescents (8 - 10 years) | 15          | TROG-2; BPVS-III; CELF-4                                                                                     | Handwritten | Persuasive letter (from prompt); single word spelling test                                           | N/A                                                                                                                                                                                          | Greater proportion of spelling errors                                                                                                                                                                                                                                                                                                                         | No difference in grammar and usage                                                                                 | Less lexical diversity; no difference in total words or different word classes (nouns and verbs)                                                            | Poorer organization and cohesion                                                                                                                   | N/A              | N/A                                                                                                                                                      | N/A                                                                                                                                                  | Yes                          | Yes                              | No                               |
| 50     | Larkin et al          | 2013       | Delay or deficit? Spelling processes in children with specific language impairment                                                                                                                                       | UK           | English         | Children & Adolescents (8 - 11)       | 15          | TROG-2; BPVS-III; CELF-4                                                                                     | Handwritten | Single word spelling; nonword spelling; morpheme spelling                                            | N/A                                                                                                                                                                                          | Poorer single word spelling; poorer phonological spelling of nonwords; no difference in orthographic spelling; poorer morphological spelling                                                                                                                                                                                                                  | N/A                                                                                                                | N/A                                                                                                                                                         | N/A                                                                                                                                                | N/A              | N/A                                                                                                                                                      | N/A                                                                                                                                                  | Yes                          | Yes                              | No                               |
| 51     | Critten et al         | 2014       | Inflectional and derivational morphological spelling abilities of children with Specific Language Impairment                                                                                                             | UK           | English         | Children & Adolescents (8 - 10 years) | 33          | CELF-4                                                                                                       | Handwritten | Single word spelling                                                                                 | N/A                                                                                                                                                                                          | Poorer spelling of single words; poorer spelling of derivational forms than inflected; DLD group made more phonologically implausible spelling errors                                                                                                                                                                                                         | N/A                                                                                                                | N/A                                                                                                                                                         | N/A                                                                                                                                                | N/A              | N/A                                                                                                                                                      | N/A                                                                                                                                                  | Yes                          | Yes                              | No                               |
| 52     | Deacon et al          | 2014       | The representation of roots in the spelling of children with specific language impairment                                                                                                                                | Canada       | English         | Children & Adolescents (7 - 10 years) | 17          | CELF-4                                                                                                       | Handwritten | Single word spelling                                                                                 | N/A                                                                                                                                                                                          | Poorer spelling of single words; no difference in spelling of derivational and inflected forms                                                                                                                                                                                                                                                                | N/A                                                                                                                | N/A                                                                                                                                                         | N/A                                                                                                                                                | N/A              | N/A                                                                                                                                                      | N/A                                                                                                                                                  | Yes                          | Yes                              | No                               |
| 53     | Dockrell et al        | 2014       | Exploring writing products in students with language impairments and autism spectrum disorders                                                                                                                           | UK           | English         | Children & Adolescents (6 - 12 years) | 93          | CELF-4 UK; BAS-II; BPVS-III; TROG-E                                                                          | Handwritten | Handwriting fluency; single-word spelling; narrative prompt                                          | 16 students with LI did not write at all; poorer handwriting fluency than students with ASD                                                                                                  | Poorer spelling than students with ASD                                                                                                                                                                                                                                                                                                                        | Less grammatical accuracy than students with ASD                                                                   | Fewer words than students with ASD                                                                                                                          | N/A                                                                                                                                                | N/A              | N/A                                                                                                                                                      | No                                                                                                                                                   | No                           | No                               |                                  |
| 54     | Justice et al         | 2015       | Empirically Based Profiles of the Early Literacy Skills of Children With Language Impairment in Early Childhood Special Education                                                                                        | USA          | English         | Children (4 - 5 years)                | 50          | Parent Report; CELF-P                                                                                        | Handwritten | Name writing                                                                                         | Poor name writing performance (relative to scale used)                                                                                                                                       | N/A                                                                                                                                                                                                                                                                                                                                                           | N/A                                                                                                                | N/A                                                                                                                                                         | N/A                                                                                                                                                | N/A              | N/A                                                                                                                                                      | N/A                                                                                                                                                  | No                           | No                               | No                               |
| 55     | Dockrell & Connelly   | 2015       | The role of oral language in underpinning the text generation difficulties in children with specific language impairment                                                                                                 | UK           | English         | Adolescents (10 years)                | 23          | CELF-R; BAS-II; BPVS-II                                                                                      | Handwritten | Narrative (WOLD); single-word spelling                                                               | Poorer overall performance on WOLD scores; poorer capitalization scores                                                                                                                      | Poorer single-word spelling; more frequent spelling errors in text; greater proportion of orthographically inaccurate spelling errors                                                                                                                                                                                                                         | Poorer scores on WOLD sentence structure and grammar                                                               | Poorer scores on WOLD vocabulary; fewer total words; fewer different words; shorter mean length of sentence; no difference in word class use (nouns, verbs) | Poorer scores on WOLD organization and coherence                                                                                                   | N/A              | N/A                                                                                                                                                      | Participants read back writing                                                                                                                       | Yes                          | Yes                              | No                               |
| 56     | Werfel & Krimm        | 2015       | Utility of the Spelling Sensitivity Score to Analyze Spellings of Children with Specific Language Impairment                                                                                                             | USA          | English         | Children & Adolescents (7 - 11 years) | 31          | CELF-4                                                                                                       | Handwritten | Single word spelling                                                                                 | N/A                                                                                                                                                                                          | Poorer single word spelling (percentage correct, word and element level linguistic knowledge)                                                                                                                                                                                                                                                                 | N/A                                                                                                                | N/A                                                                                                                                                         | N/A                                                                                                                                                | N/A              | N/A                                                                                                                                                      | N/A                                                                                                                                                  | Yes                          | No                               | No                               |
| 57     | Favart et al          | 2016       | The management of cohesion in written narratives in students with specific language impairment: Differences between childhood and adolescence                                                                            | France       | French          | Children & Adolescents (7 - 18 years) | 24          | BILO2; N-EEL; BILO3C; LZMA                                                                                   | Handwritten | Narrative composition                                                                                | N/A                                                                                                                                                                                          | N/A                                                                                                                                                                                                                                                                                                                                                           | Fewer and less diverse use of anaphors (children only); Adolescents with DLD used fewer commas than TD adolescents | Fewer total words; Children wrote shorter narratives than adolescents                                                                                       | Less density and diversity of cohesive devices (children only)                                                                                     | N/A              | N/A                                                                                                                                                      | Participants read back writing                                                                                                                       | Yes                          | No                               | No                               |
| 58     | Koutsoftas            | 2016       | Writing Process Products In Intermediate-Grade Children With and Without Language-Based Learning Disabilities                                                                                                            | USA          | English         | Children & Adolescents (8 - 12 years) | 32          | Case review; parent report                                                                                   | Handwritten | Narrative prompt                                                                                     | Poorer overall writing quality scores                                                                                                                                                        | Poorer spelling in both first and final drafts                                                                                                                                                                                                                                                                                                                | No difference in grammatical accuracy                                                                              | Fewer sentences in both first and final drafts                                                                                                              | No differences in idea generation or organization at the planning stage; no differences in rates of revision between drafts                        | N/A              | N/A                                                                                                                                                      | N/A                                                                                                                                                  | Yes                          | No                               | No                               |
| 59     | Koutsoftas & Petersen | 2017       | Written cohesion in children with and without language learning disabilities                                                                                                                                             | USA          | English         | Children & Adolescents (9 - 12 years) | 25          | IEP Review; CELF-4                                                                                           | Handwritten | Narrative and Expository (prompts)                                                                   | N/A                                                                                                                                                                                          | Greater proportion of spelling errors                                                                                                                                                                                                                                                                                                                         | N/A                                                                                                                | Fewer total words                                                                                                                                           | No difference in time spent writing; more conjunctive ties; fewer complete cohesive ties; less complex cohesive ties                               | N/A              | N/A                                                                                                                                                      | More frequent use of referential cohesive devices in narratives; more completed cohesive ties in narratives more complex cohesive ties in expository | Yes                          | No                               | No                               |
| 60     | Pavelko et al         | 2017       | The development of writing skills in 4-year-old children with and without specific language impairment                                                                                                                   | USA          | English         | Children (4 years)                    | 22          | ALL                                                                                                          | Handwritten | Letter writing, name writing, single word writing, sentence writing (picture description and retell) | Poorer letter writing, name writing, single word writing, and sentence retell writing                                                                                                        | N/A                                                                                                                                                                                                                                                                                                                                                           | N/A                                                                                                                | N/A                                                                                                                                                         | N/A                                                                                                                                                | N/A              | N/A                                                                                                                                                      | N/A                                                                                                                                                  | Yes                          | No                               | No                               |
| 61     | Shen & Troia          | 2017       | Teaching Children With Language-Learning Disabilities to Plan and Revise Compare-Contrast Texts                                                                                                                          | USA          | English         | Children & Adolescents (9 - 11 years) | 3           | OWLS-II; case review                                                                                         | Handwritten | Compare-contrast prompt; expository prompt                                                           | Qualitatively poor % correct writing sequences (i.e., two adjacent words correctly spelled, capitalized, punctuated) at baseline; poor overall writing quality at baseline relative to scale | N/A                                                                                                                                                                                                                                                                                                                                                           | N/A                                                                                                                | Students wrote qualitatively short essays at baseline; essays post treatment were significantly longer                                                      | Students did not spend any time planning or revising their essays at baseline; qualitatively poor inclusion of text structure elements at baseline | N/A              | N/A                                                                                                                                                      | Participant spelling and grammar was corrected prior to assigning writing quality scores                                                             | No                           | No                               | No                               |
| 62     | Pavelko et al         | 2018       | The Contributions of Phonological Awareness, Alphabet Knowledge, and Letter Writing to Name Writing in Children With Specific Language Impairment and Typically Developing Children                                      | USA          | English         | Children (4 years)                    | 22          | ALL                                                                                                          | Handwritten | Name writing                                                                                         | Slower acquisition of fundamental skills to support name writing                                                                                                                             | N/A                                                                                                                                                                                                                                                                                                                                                           | N/A                                                                                                                | N/A                                                                                                                                                         | N/A                                                                                                                                                | N/A              | N/A                                                                                                                                                      | N/A                                                                                                                                                  | Yes                          | No                               | No                               |
| 63     | Stuart et al          | 2019       | Written verb use and diversity in children with Developmental Language Disorder: stepping stones to academic writing                                                                                                     | UK           | English         | Children & Adolescents (9 - 10)       | 30          | CELF-4 UK; case review; BAS-II                                                                               | Handwritten | Narrative (WOLD)                                                                                     | Poorer overall performance on WOLD scores; poorer capitalization scores                                                                                                                      | N/A                                                                                                                                                                                                                                                                                                                                                           | Poorer scores on WOLD sentence structure and grammar; no differences in uses of verb argument structures           | Poorer scores on WOLD vocabulary; fewer words; fewer total verbs; fewer different verbs                                                                     | Poorer scores on WOLD organization and coherence                                                                                                   | N/A              | N/A                                                                                                                                                      | Participants read back writing                                                                                                                       | Yes                          | Yes                              | No                               |
| 64     | Snowling et al        | 2019       | Developmental Outcomes for Children at High Risk of Dyslexia and Children With Developmental Language Disorder                                                                                                           | UK           | English         | Children (8 years)                    | 67          | CELF-4; TROG                                                                                                 | Handwritten | Single word spelling                                                                                 | N/A                                                                                                                                                                                          | Poorer single word spelling regardless of dyslexia comorbidity                                                                                                                                                                                                                                                                                                | N/A                                                                                                                | N/A                                                                                                                                                         | N/A                                                                                                                                                | N/A              | N/A                                                                                                                                                      | N/A                                                                                                                                                  | No                           | No                               | No                               |
| 65     | Pratt et al           | 2020       | Emergent Literacy in Spanish-Speaking Children With Developmental Language Disorder: Preliminary Findings of Delays in Comprehension- and Code-Related Skills                                                            | Mexico       | Spanish         | Children (4 - 5 years)                | 15          | BELE                                                                                                         | Handwritten | Name writing                                                                                         | Lower name writing scores                                                                                                                                                                    | N/A                                                                                                                                                                                                                                                                                                                                                           | N/A                                                                                                                | N/A                                                                                                                                                         | N/A                                                                                                                                                | N/A              | N/A                                                                                                                                                      | N/A                                                                                                                                                  | Yes                          | No                               | No                               |
| 66     | Botting               | 2020       | Language, literacy and cognitive skills of young adults with developmental language disorder (DLD)                                                                                                                       | UK           | English         | Adults (24 years)                     | 83          | CELF-4                                                                                                       | Self Report | Self report of difficulty with writing                                                               | Greater percentage of DLD group reported difficulty with writing in everyday tasks                                                                                                           | N/A                                                                                                                                                                                                                                                                                                                                                           | N/A                                                                                                                | N/A                                                                                                                                                         | N/A                                                                                                                                                | N/A              | N/A                                                                                                                                                      | No direct measure of writing                                                                                                                         | Yes                          | No                               | No                               |
| 67     | Joye et al            | 2020       | The Spelling Errors of French and English Children With Developmental Language Disorder at the End of Primary School                                                                                                     | UK, France   | English, French | Children & Adolescents (8 - 12 years) | 34          | Individual subtests of: LZMA2; BALE; CELF-4; TROG-2; BPVS-3                                                  | Handwritten | Narrative, single word spelling                                                                      | N/A                                                                                                                                                                                          | Greater proportion of misspelled words in narratives; poorer single word spelling; French: more phonological errors in narratives and single word spelling, more orthographic and semantic errors in narratives; English: more phonological and orthographic errors in single word spelling; Both: more morphological spelling errors in single word spelling | N/A                                                                                                                | Fewer total words                                                                                                                                           | N/A                                                                                                                                                | N/A              | N/A                                                                                                                                                      | Yes                                                                                                                                                  | Yes                          | No                               |                                  |
| 68     | Dynia & Solari        | 2021       | Print Knowledge in Children With Autism Spectrum Disorder: Do Child and Family Variables Play a Role?                                                                                                                    | USA          | English         | Children (4 - 6 years)                | 93          | IEP Review                                                                                                   | Handwritten | Name writing                                                                                         | No difference in name writing                                                                                                                                                                | N/A                                                                                                                                                                                                                                                                                                                                                           | N/A                                                                                                                | N/A                                                                                                                                                         | N/A                                                                                                                                                | N/A              | N/A                                                                                                                                                      | N/A                                                                                                                                                  | Yes                          | No                               | No                               |
| 69     | Williams et al        | 2021       | Orthographic Knowledge and Cue Word Facilitated Spelling in Children With Developmental Language Disorder                                                                                                                | UK           | English         | Children & Adolescents (5 - 11 years) | 37          | CELF-5                                                                                                       | Handwritten | Single word and nonword spelling                                                                     | N/A                                                                                                                                                                                          | Poorer single-word and nonword spelling (orthographic acceptability, vowel accuracy, phonological plausibility)                                                                                                                                                                                                                                               | N/A                                                                                                                | N/A                                                                                                                                                         | N/A                                                                                                                                                | N/A              | N/A                                                                                                                                                      | N/A                                                                                                                                                  | Yes                          | Yes                              | No                               |
| 70     | Moonsamy              | 2021       | Written narratives of Grade 5 learners with developmental language difficulties: A group discussion intervention study                                                                                                   | South Africa | English         | Adolescents (10 - 13 years)           | 10          | Case review                                                                                                  | Handwritten | Narrative prompt                                                                                     | Low macro- and microstructure scores at pre-intervention relative to scale                                                                                                                   | N/A                                                                                                                                                                                                                                                                                                                                                           | N/A                                                                                                                | N/A                                                                                                                                                         | N/A                                                                                                                                                | N/A              | N/A                                                                                                                                                      | N/A                                                                                                                                                  | No                           | No                               | No                               |
| 71     | Ralli et al           | 2021       | Written text production in Greek-speaking children with Developmental Language Disorder and typically developing peers, in relation to their oral language, cognitive, visual-motor coordination, and handwriting skills | Greece       | Greek           | Children (2nd grade)                  | 30          | Case review; Word Finding Vocabulary Test 4th ed)                                                            | Handwritten | Alphabet writing; narrative prompt                                                                   | Poorer alphabet writing fluency                                                                                                                                                              | Greater proportion of spelling errors                                                                                                                                                                                                                                                                                                                         | Greater proportion of subject-verb agreement errors                                                                | Fewer total words; fewer different words; fewer clauses                                                                                                     | N/A                                                                                                                                                | N/A              | N/A                                                                                                                                                      | N/A                                                                                                                                                  | Yes                          | No                               | No                               |
| 72     | Andreou & Aslanoglou  | 2022       | Written Language Production in Children With Developmental Language Disorders                                                                                                                                            | Greece       | Greek           | Children (6 - 9 years)                | 31          | Case Review                                                                                                  | Handwritten | Narrative                                                                                            | Fewer content words                                                                                                                                                                          | Greater proportion of misspelled words                                                                                                                                                                                                                                                                                                                        | Fewer nouns                                                                                                        | Fewer total words; fewer different words; no difference in clause use                                                                                       | N/A                                                                                                                                                | N/A              | N/A                                                                                                                                                      | N/A                                                                                                                                                  | Yes                          | No                               | No                               |
