# Supplementary material
Source: publisher figshare collection journal article supplement (https://asha.figshare.com/articles/dataset/_/23596797)
Supplement: Supplementary file 2 [file 1]

**Supplemental Material S3.** Complete reference list for all 74 studies included in the final synthesis.

- Andreou, G., & Aslanoglou, V. (2022). Written Language Production in Children With Developmental Language Disorder. *Front Psychol*, 13, 833429. <https://doi.org/10.3389/fpsyg.2022.833429>
- Bishop, D., & Clarkson, B. (2003). Written Language as a Window in to Residual Language Deficits: A Study of Children With Persistent and Residual Speech and Language Impairments. *Cortex*, 39(2), 215-237. [https://doi.org/10.1016/s0010-9452\(08\)70106-0](https://doi.org/10.1016/s0010-9452(08)70106-0)
- Botting, N. (2020, Mar). Language, literacy and cognitive skills of young adults with developmental language disorder (DLD). *Int J Lang Commun Disord*, 55(2), 255-265. <https://doi.org/10.1111/1460-6984.12518>
- Boudreau, D. (2005). Use of a Parent Questionnaire in Emergent and Early Literacy Assessment of Preschool Children. *Language, Speech, and Hearing Services in Schools*, 36(1), 33-47. [https://doi.org/10.1044/0161-1461\(2005/004\)](https://doi.org/10.1044/0161-1461(2005/004))
- Brizzolara, D., Gasperini, F., Pfanner, L., Cristofani, P., Casalini, C., & Chilosi, A. M. (2011, Sep). Long-term reading and spelling outcome in Italian adolescents with a history of specific language impairment. *Cortex*, 47(8), 955-973. <https://doi.org/10.1016/j.cortex.2011.02.009>
- Broc, L., Bernicot, J., Olive, T., Favart, M., Reilly, J., Quemart, P., & Uze, J. (2013, Oct). Lexical spelling in children and adolescents with specific language impairment: variations with the writing situation. *Res Dev Disabil*, 34(10), 3253-3266. <https://doi.org/10.1016/j.ridd.2013.06.025>
- Brouwer, K. L. (2012). Writing motivation of students with language impairments. *Child Language Teaching and Therapy*, 28(2), 189-210. <https://doi.org/10.1177/0265659012436850>
- Cabell, S. Q., Justice, L. M., Zucker, T. A., & McGinty, A. S. (2009, Jan). Emergent name-writing abilities of preschool-age children with language impairment. *Lang Speech Hear Serv Sch*, 40(1), 53-66. [https://doi.org/10.1044/0161-1461\(2008/07-0052\)](https://doi.org/10.1044/0161-1461(2008/07-0052))
- Cabell, S. Q., Lomax, R. G., Justice, L. M., Breit-Smith, A., Skibbe, L. E., & McGinty, A. S. (2010, Dec). Emergent literacy profiles of preschool-age children with specific language impairment. *Int J Speech Lang Pathol*, 12(6), 472-482. <https://doi.org/10.3109/17549507.2011.492874>
- Catts, H. W., Fey, M. E., & Proctor-Williams, K. (2000). The relationship between language and reading. Preliminary results from a longitudinal investigation. *Logoped Phoniatr Vocol*, 25(1), 3-11. <https://doi.org/10.1080/140154300750045858>
- Clegg, J., Hollis, C., Mawhood, L., & Rutter, M. (2005, Feb). Developmental language disorders-a follow-up in later adult life. Cognitive, language and psychosocial outcomes. *J Child Psychol Psychiatry*, 46(2), 128-149. <https://doi.org/10.1111/j.1469-7610.2004.00342.x>
- Connelly, V., Dockrell, J. E., Walter, K., & Critten, S. (2012). Predicting the Quality of Composition and Written Language Bursts From Oral Language, Spelling, and Handwriting Skills in Children With and Without Specific Language Impairment. *Written Communication*, 29(3), 278-302. <https://doi.org/10.1177/0741088312451109>
- Conti-Ramsden, G., Durkin, K., & Simkin, Z. (2010). Language and Social Factors in the Use of Cell Phone Technology by Adolescents With and Without Specific Language Impairment (SLI). *Journal of Speech, Language, and Hearing Research*, 53(1), 196-208. [https://doi.org/10.1044/1092-4388\(2009/08-0241\)](https://doi.org/10.1044/1092-4388(2009/08-0241))
- Conti-Ramsden, G., Durkin, K., & Walker, A. J. (2012, Mar-Apr). The messages they send: e-mail use by adolescents with and without a history of specific language impairment (SLI). *Int J Lang Commun Disord*, 47(2), 217-228. <https://doi.org/10.1111/j.1460-6984.2011.00096.x>

- Cordewener, K. A., Bosman, A. M., & Verhoeven, L. (2012a, May-Jun). Characteristics of early spelling of children with Specific Language Impairment. *J Commun Disord*, 45(3), 212-222. <https://doi.org/10.1016/j.jcomdis.2012.01.003>
- Cordewener, K. A., Bosman, A. M., & Verhoeven, L. (2012b, Nov-Dec). Predicting early spelling difficulties in children with specific language impairment: a clinical perspective. *Res Dev Disabil*, 33(6), 2279-2291. <https://doi.org/10.1016/j.ridd.2012.07.003>
- Cordewener, K. A., Bosman, A. M., & Verhoeven, L. (2012c, Jul-Aug). Specific Language Impairment affects the early spelling process quantitatively but not qualitatively. *Res Dev Disabil*, 33(4), 1041-1047. <https://doi.org/10.1016/j.ridd.2012.01.011>
- Critten, S., Connelly, V., Dockrell, J. E., & Walter, K. (2014). Inflectional and derivational morphological spelling abilities of children with Specific Language Impairment. *Front Psychol*, 5, 948. <https://doi.org/10.3389/fpsyg.2014.00948>
- Deacon, S. H., Cleave, P. L., Baylis, J., Fraser, J., Ingram, E., & Perlmutter, S. (2014, Jan-Feb). The representation of roots in the spelling of children with specific language impairment. *J Learn Disabil*, 47(1), 13-21. <https://doi.org/10.1177/0022219413509965>
- Dockrell, J. E., & Connelly, V. (2015). The role of oral language in -underpinning the text generation -difficulties in children with specific -language impairment. *Journal of Research in Reading*, 38(1), 18-34. <https://doi.org/10.1111/j.1467-9817.2012.01550.x>
- Dockrell, J. E., Ricketts, J., Charman, T., & Lindsay, G. (2014). Exploring writing products in students with language impairments and autism spectrum disorders. *Learning and Instruction*, 32, 81-90. <https://doi.org/10.1016/j.learninstruc.2014.01.008>
- Durkin, K., Conti-Ramsden, G., & Walker, A. J. (2011). Txt lang: Texting, textism use and literacy abilities in adolescents with and without specific language impairment. *Journal of Computer Assisted Learning*, 27(1), 49-57. <https://doi.org/10.1111/j.1365-2729.2010.00397.x>
- Dynia, J. M., & Solari, E. J. (2021, Jan 19). Print Knowledge in Children With Autism Spectrum Disorder: Do Child and Family Variables Play a Role? *Lang Speech Hear Serv Sch*, 52(1), 197-208. [https://doi.org/10.1044/2020\\_LSHSS-20-00025](https://doi.org/10.1044/2020_LSHSS-20-00025)
- Favart, M., Potocki, A., Broc, L., Quemart, P., Bernicot, J., & Olive, T. (2016, Dec). The management of cohesion in written narratives in students with specific language impairment: Differences between childhood and adolescence. *Res Dev Disabil*, 59, 318-327. <https://doi.org/10.1016/j.ridd.2016.09.009>
- Fey, M. E., Catts, H. W., Proctor-Williams, K., Tomblin, J. B., & Zhang, X. (2004, Dec). Oral and written story composition skills of children with language impairment. *J Speech Lang Hear Res*, 47(6), 1301-1318. [https://doi.org/10.1044/1092-4388\(2004/098\)](https://doi.org/10.1044/1092-4388(2004/098))
- Freed, J., Adams, C., & Lockton, E. (2011, May-Jun). Literacy skills in primary school-aged children with pragmatic language impairment: a comparison with children with specific language impairment. *Int J Lang Commun Disord*, 46(3), 334-347. <https://doi.org/10.3109/13682822.2010.500316>
- Gillam, R. B., & Johnston, J. R. (1992, Dec). Spoken and written language relationships in language/learning-impaired and normally achieving school-age children. *J Speech Hear Res*, 35(6), 1303-1315. <https://doi.org/10.1044/jshr.3506.1303>
- Gillon, G. T. (2002, Oct-Dec). Follow-up study investigating the benefits of phonological awareness intervention for children with spoken language impairment. *Int J Lang Commun Disord*, 37(4), 381-400. <https://doi.org/10.1080/1368282021000007776>
- Goulondris, N. K., Snowling, M. J., & Walker, I. (2000, Jan). Is dyslexia a form of specific language impairment? A comparison of dyslexic and language impaired children as adolescents. *Ann Dyslexia*, 50(1), 103-120. <https://doi.org/10.1007/s11881-000-0019-1>
- Hall, N. E., & Segarra, V. R. (2007, Jan-Feb). Predicting academic performance in children with language impairment: the role of parent report. *J Commun Disord*, 40(1), 82-95. <https://doi.org/10.1016/j.jcomdis.2006.06.001>

- Hedberg, N. L., & Fink, R. J. (1996). Cohesive harmony in the written stories of elementary children. *Reading and Writing*, 8(1), 73-86. <https://doi.org/10.1007/bf00423926>
- Johnson, C. J., Beitchman, J. H., Young, A., Escobar, M., Atkinson, L., Wilson, B., Brownlie, E. B., Douglas, L., Taback, N., Lam, I., & Wang, M. (1999, Jun). Fourteen-year follow-up of children with and without speech/language impairments: speech/language stability and outcomes. *J Speech Lang Hear Res*, 42(3), 744-760. <https://doi.org/10.1044/jslhr.4203.744>
- Joye, N., Dockrell, J. E., & Marshall, C. R. (2020). The Spelling Errors of French and English Children With Developmental Language Disorder at the End of Primary School. *Front Psychol*, 11, 1789. <https://doi.org/10.3389/fpsyg.2020.01789>
- Justice, L., Logan, J., Kaderavek, J., Schmitt, M. B., Tompkins, V., & Bartlett, C. (2015, Sep-Oct). Empirically Based Profiles of the Early Literacy Skills of Children With Language Impairment in Early Childhood Special Education. *J Learn Disabil*, 48(5), 482-494. <https://doi.org/10.1177/0022219413510179>
- Koutsoftas, A. D. (2016, Dec 1). Writing Process Products in Intermediate-Grade Children With and Without Language-Based Learning Disabilities. *J Speech Lang Hear Res*, 59(6), 1471-1483. [https://doi.org/10.1044/2016\\_JSLHR-L-15-0133](https://doi.org/10.1044/2016_JSLHR-L-15-0133)
- Koutsoftas, A. D., & Gray, S. (2012). Comparison of Narrative and Expository Writing in Students With and Without Language-Learning Disabilities. *Language, Speech, and Hearing Services in Schools*, 43(4), 395-409. [https://doi.org/10.1044/0161-1461\(2012/11-0018\)](https://doi.org/10.1044/0161-1461(2012/11-0018))
- Koutsoftas, A. D., & Petersen, V. (2017, Sep). Written cohesion in children with and without language learning disabilities. *Int J Lang Commun Disord*, 52(5), 612-625. <https://doi.org/10.1111/1460-6984.12306>
- Larkin, R. F., Williams, G. J., & Blaggan, S. (2013, Sep-Dec). Delay or deficit? Spelling processes in children with specific language impairment. *J Commun Disord*, 46(5-6), 401-412. <https://doi.org/10.1016/j.jcomdis.2013.07.003>
- Lewis, B. A., O'Donnell, B., Freebairn, L. A., & Taylor, H. G. (1998). Spoken Language and Written Expression—Interplay of Delays. *American Journal of Speech-Language Pathology*, 7(3), 77-84. <https://doi.org/10.1044/1058-0360.0703.77>
- Mackie, C., & Dockrell, J. E. (2004, Dec). The nature of written language deficits in children with SLI. *J Speech Lang Hear Res*, 47(6), 1469-1483. [https://doi.org/10.1044/1092-4388\(2004/109\)](https://doi.org/10.1044/1092-4388(2004/109))
- Mackie, C. J., Dockrell, J., & Lindsay, G. (2012). An evaluation of the written texts of children with SLI: the contributions of oral language, reading and phonological short-term memory. *Reading and Writing*, 26(6), 865-888. <https://doi.org/10.1007/s11145-012-9396-1>
- McCarthy, J. H., Hogan, T. P., & Catts, H. W. (2012, Sep). Is weak oral language associated with poor spelling in school-age children with specific language impairment, dyslexia or both? *Clin Linguist Phon*, 26(9), 791-805. <https://doi.org/10.3109/02699206.2012.702185>
- McFadden, T. U., & Gillam, R. B. (1996). An Examination of the Quality of Narratives Produced by Children With Language Disorders. *Language, Speech, and Hearing Services in Schools*, 27(1), 48-56. <https://doi.org/10.1044/0161-1461.2701.48>
- Moonsamy, S. (2021). Written narratives of Grade 5 learners with developmental language difficulties: A group discussion intervention study. *Per Linguam*, 37(1), 45-67. <https://doi.org/10.5785/37-1-969>
- Mortensen, L., Smith-Lock, K., & Nickels, L. (2008). Text structure and patterns of cohesion in narrative texts written by adults with a history of language impairment. *Reading and Writing*, 22(6), 735-752. <https://doi.org/10.1007/s11145-008-9150-x>

- Pavelko, S. L., Lieberman, R. J., Schwartz, J., & Hahs-Vaughn, D. (2018, Feb 6). The Contributions of Phonological Awareness, Alphabet Knowledge, and Letter Writing to Name Writing in Children With Specific Language Impairment and Typically Developing Children. *Am J Speech Lang Pathol*, 27(1), 166-180. [https://doi.org/10.1044/2017\\_AJSLP-17-0084](https://doi.org/10.1044/2017_AJSLP-17-0084)
- Pavelko, S. L., Lieberman, R. J., Schwartz, J., Hahs-Vaughn, D., & Nye, C. (2017). The development of writing skills in 4-year-old children with and without specific language impairment. *Clin Linguist Phon*, 31(7-9), 682-696. <https://doi.org/10.1080/02699206.2017.1310298>
- Pratt, A. S., Grinstead, J. A., & McCauley, R. J. (2020, Dec 14). Emergent Literacy in Spanish-Speaking Children With Developmental Language Disorder: Preliminary Findings of Delays in Comprehension- and Code-Related Skills. *J Speech Lang Hear Res*, 63(12), 4193-4207. [https://doi.org/10.1044/2020\\_JSLHR-19-00239](https://doi.org/10.1044/2020_JSLHR-19-00239)
- Puranik, C. S., Lombardino, L. J., & Altmann, L. J. (2006). Writing through retellings: an exploratory study of language-impaired and dyslexic populations. *Reading and Writing*, 20(3), 251-272. <https://doi.org/10.1007/s11145-006-9030-1>
- Puranik, C. S., & Lonigan, C. J. (2012, Mar-Apr). Early writing deficits in preschoolers with oral language difficulties. *J Learn Disabil*, 45(2), 179-190. <https://doi.org/10.1177/0022219411423423>
- Ralli, A. M., Chrysochoou, E., Giannitsa, A., & Angelaki, S. (2021). Written text production in Greek-speaking children with Developmental Language Disorder and typically developing peers, in relation to their oral language, cognitive, visual-motor coordination, and handwriting skills. *Reading and Writing*, 35(3), 713-741. <https://doi.org/10.1007/s11145-021-10196-9>
- Rubin, H., Patterson, P. A., & Kantor, M. (1991). Morphological Development and Writing Ability in Children and Adults. *Language, Speech, and Hearing Services in Schools*, 22(4), 228-235. <https://doi.org/10.1044/0161-1461.2204.228>
- Scott, C. M., & Windsor, J. (2000, Apr). General language performance measures in spoken and written narrative and expository discourse of school-age children with language learning disabilities. *J Speech Lang Hear Res*, 43(2), 324-339. <https://doi.org/10.1044/jslhr.4302.324>
- Scuccimarra, G., Cutolo, L., Fiorillo, P., Lembo, C., Pirone, T., & Cossu, G. (2008, Dec). Is there a distinct form of developmental dyslexia in children with specific language impairment? Findings from an orthographically regular language. *Cogn Behav Neurol*, 21(4), 221-226. <https://doi.org/10.1097/WNN.0b013e31818a5caf>
- Shen, M., & Troia, G. A. (2017). Teaching Children With Language-Learning Disabilities to Plan and Revise Compare-Contrast Texts. *Learning Disability Quarterly*, 41(1), 44-61. <https://doi.org/10.1177/0731948717701260>
- Silliman, E. R., Bahr, R. H., & Peters, M. L. (2006). Spelling patterns in preadolescents with atypical language skills: phonological, morphological, and orthographic factors. *Dev Neuropsychol*, 29(1), 93-123. [https://doi.org/10.1207/s15326942dn2901\\_6](https://doi.org/10.1207/s15326942dn2901_6)
- Smith-Lock, K. M., Nickels, L., & Mortensen, L. (2008). Story writing skills of adults with a history language-impairment. *Reading and Writing*, 22(6), 713-734. <https://doi.org/10.1007/s11145-008-9138-6>
- Snowling, M., Bishop, D. V. M., & Stothard, S. E. (2000). Is Preschool Language Impairment a Risk Factor for Dyslexia in Adolescence? *Journal of Child Psychology and Psychiatry*, 41(5), 587-600. <https://doi.org/10.1017/s0021963099005752>
- Snowling, M. J., Nash, H. M., Gooch, D. C., Hayiou-Thomas, M. E., Hulme, C., Wellcome, L., & Reading Project, T. (2019, Sep). Developmental Outcomes for Children at High Risk of Dyslexia and Children With Developmental Language Disorder. *Child Dev*, 90(5), e548-e564. <https://doi.org/10.1111/cdev.13216>



- Stothard, S. E., Snowling, M. J., Bishop, D. V., Chipchase, B. B., & Kaplan, C. A. (1998, Apr). Language-impaired preschoolers: a follow-up into adolescence. *J Speech Lang Hear Res*, 41(2), 407-418. <https://doi.org/10.1044/jslhr.4102.407>
- Stuart, N. J., Connelly, V., & Dockrell, J. E. (2019). Written verb use and diversity in children with Developmental Language Disorder: stepping stones to academic writing. *Reading and Writing*, 33(1), 67-96. <https://doi.org/10.1007/s11145-019-09978-z>
- Suddarth, R., Plante, E., & Vance, R. (2012, Apr). Written narrative characteristics in adults with language impairment. *J Speech Lang Hear Res*, 55(2), 409-420. [https://doi.org/10.1044/1092-4388\(2011/10-0295\)](https://doi.org/10.1044/1092-4388(2011/10-0295))
- van Weerdenburg, M., Verhoeven, L., Bosman, A., & van Balkom, H. (2011, May-Jun). Predicting word decoding and word spelling development in children with Specific Language Impairment. *J Commun Disord*, 44(3), 392-411. <https://doi.org/10.1016/j.jcomdis.2010.12.002>
- Vandewalle, E., Boets, B., Ghesquiere, P., & Zink, I. (2012, Mar-Apr). Auditory processing and speech perception in children with specific language impairment: relations with oral language and literacy skills. *Res Dev Disabil*, 33(2), 635-644. <https://doi.org/10.1016/j.ridd.2011.11.005>
- Werfel, K. L., & Krimm, H. (2015, Jan 1). Utility of the Spelling Sensitivity Score to Analyze Spellings of Children with Specific Language Impairment. *Aust J Learn Diffic*, 20(1), 39-53. <https://doi.org/10.1080/19404158.2015.1047871>
- Whitehouse, A. J., Line, E. A., Watt, H. J., & Bishop, D. V. (2009, Jul-Aug). Qualitative aspects of developmental language impairment relate to language and literacy outcome in adulthood. *Int J Lang Commun Disord*, 44(4), 489-510. <https://doi.org/10.1080/13682820802708080>
- Williams, G. J., Larkin, R. F., & Blaggan, S. (2013, Mar-Apr). Written language skills in children with specific language impairment. *Int J Lang Commun Disord*, 48(2), 160-171. <https://doi.org/10.1111/1460-6984.12010>
- Williams, G. J., Larkin, R. F., Rose, N. V., Whitaker, E., Roeser, J., & Wood, C. (2021, Oct 4). Orthographic Knowledge and Clue Word Facilitated Spelling in Children With Developmental Language Disorder. *J Speech Lang Hear Res*, 64(10), 3909-3927. [https://doi.org/10.1044/2021\\_JSLHR-20-00710](https://doi.org/10.1044/2021_JSLHR-20-00710)
- Windsor, J., Scott, C. M., & Street, C. K. (2000, Dec). Verb and noun morphology in the spoken and written language of children with language learning disabilities. *J Speech Lang Hear Res*, 43(6), 1322-1336. <https://doi.org/10.1044/jslhr.4306.1322>
- Wolter, J. A., & Apel, K. (2010, Feb). Initial acquisition of mental graphemic representations in children with language impairment. *J Speech Lang Hear Res*, 53(1), 179-195. [https://doi.org/10.1044/1092-4388\(2009/07-0130\)](https://doi.org/10.1044/1092-4388(2009/07-0130))
- Wolter, J. A., Self, T., & Apel, K. (2011, Nov-Dec). Initial mental graphemic representation acquisition and later literacy achievement in children with language impairment: a longitudinal study. *J Learn Disabil*, 44(6), 543-555. <https://doi.org/10.1177/0022219410392042>
- Young, A. R., Beitchman, J. H., Johnson, C., Douglas, L., Atkinson, L., Escobar, M., & Wilson, B. (2002, Jul). Young adult academic outcomes in a longitudinal sample of early identified language impaired and control children. *J Child Psychol Psychiatry*, 43(5), 635-645. <https://doi.org/10.1111/1469-7610.00052>
