# Supplementary material
Source: publisher figshare collection journal article supplement (https://asha.figshare.com/articles/dataset/_/23596797)

**Supplemental Material S2.** Country, language, and year of publication figures for studies included in final synthesis.

**Figure S1.** Language spoken by study participants with DLD.

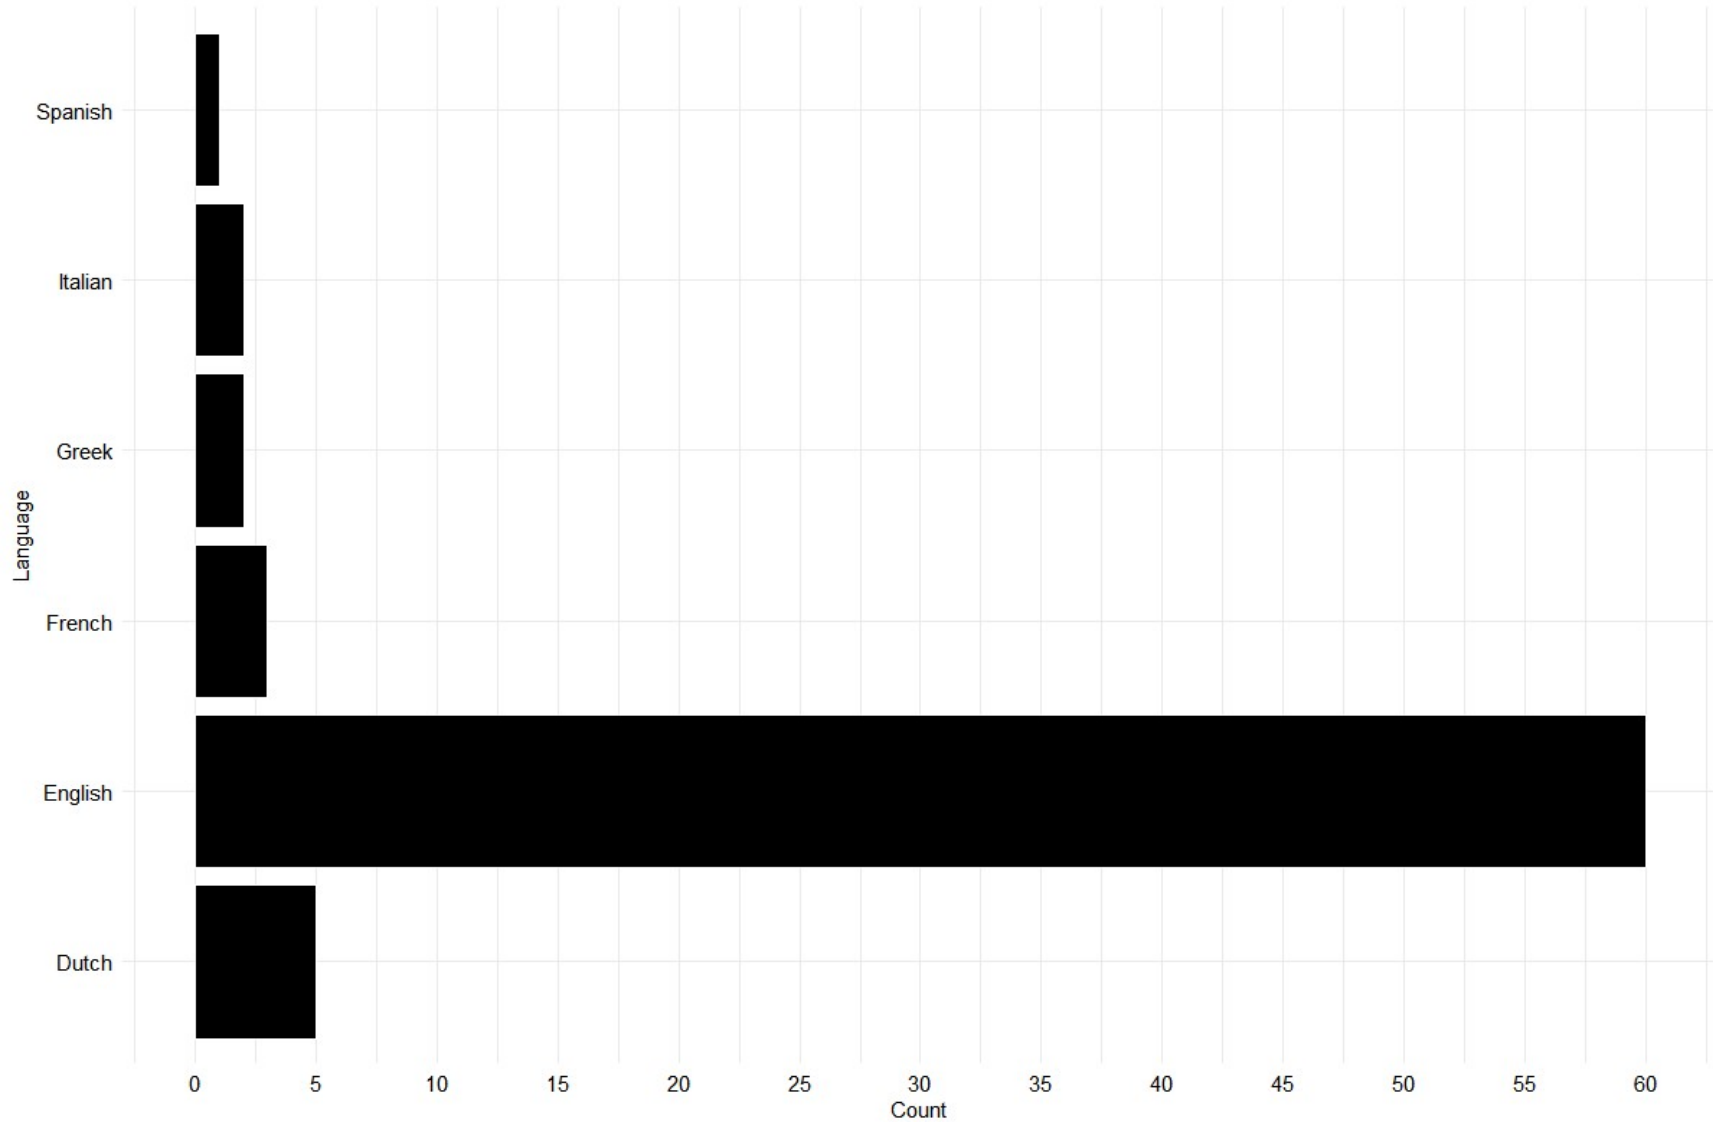

**Supplemental Figure S2.** Number of studies per country.

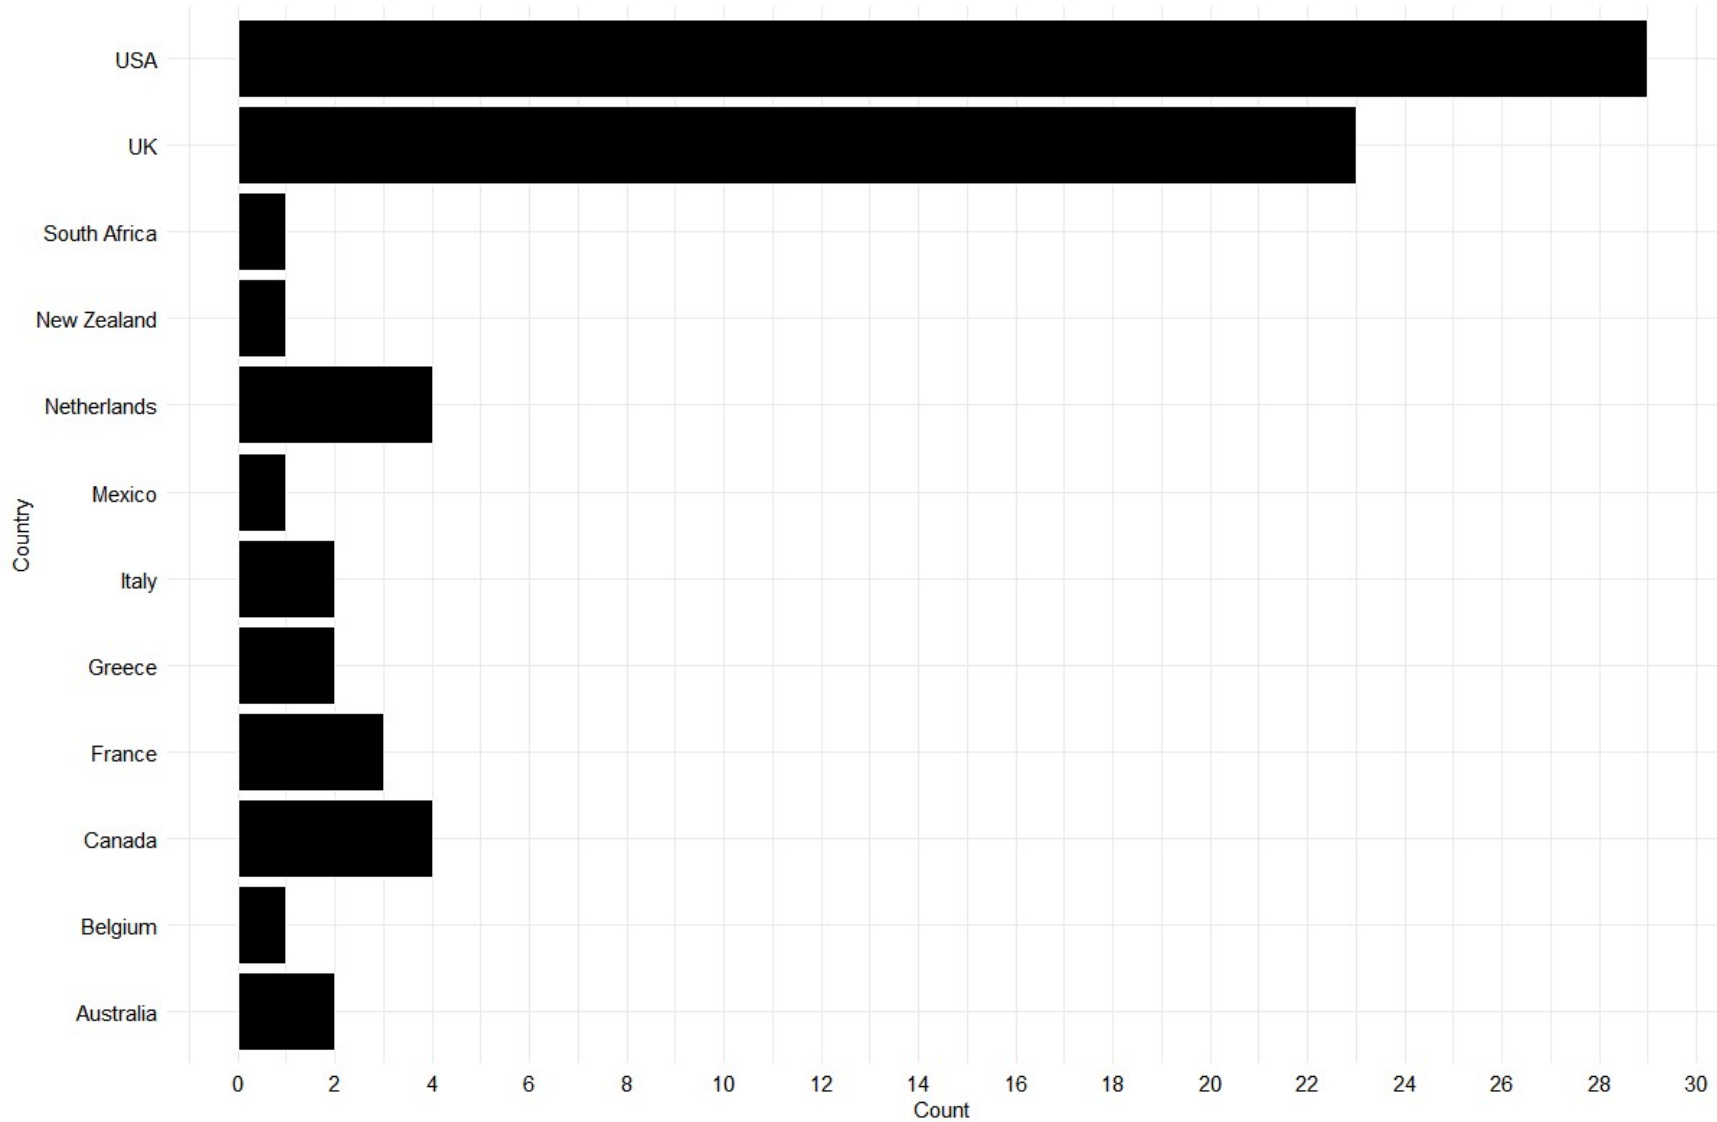

**Supplemental Figure S3.** Number of studies per year.

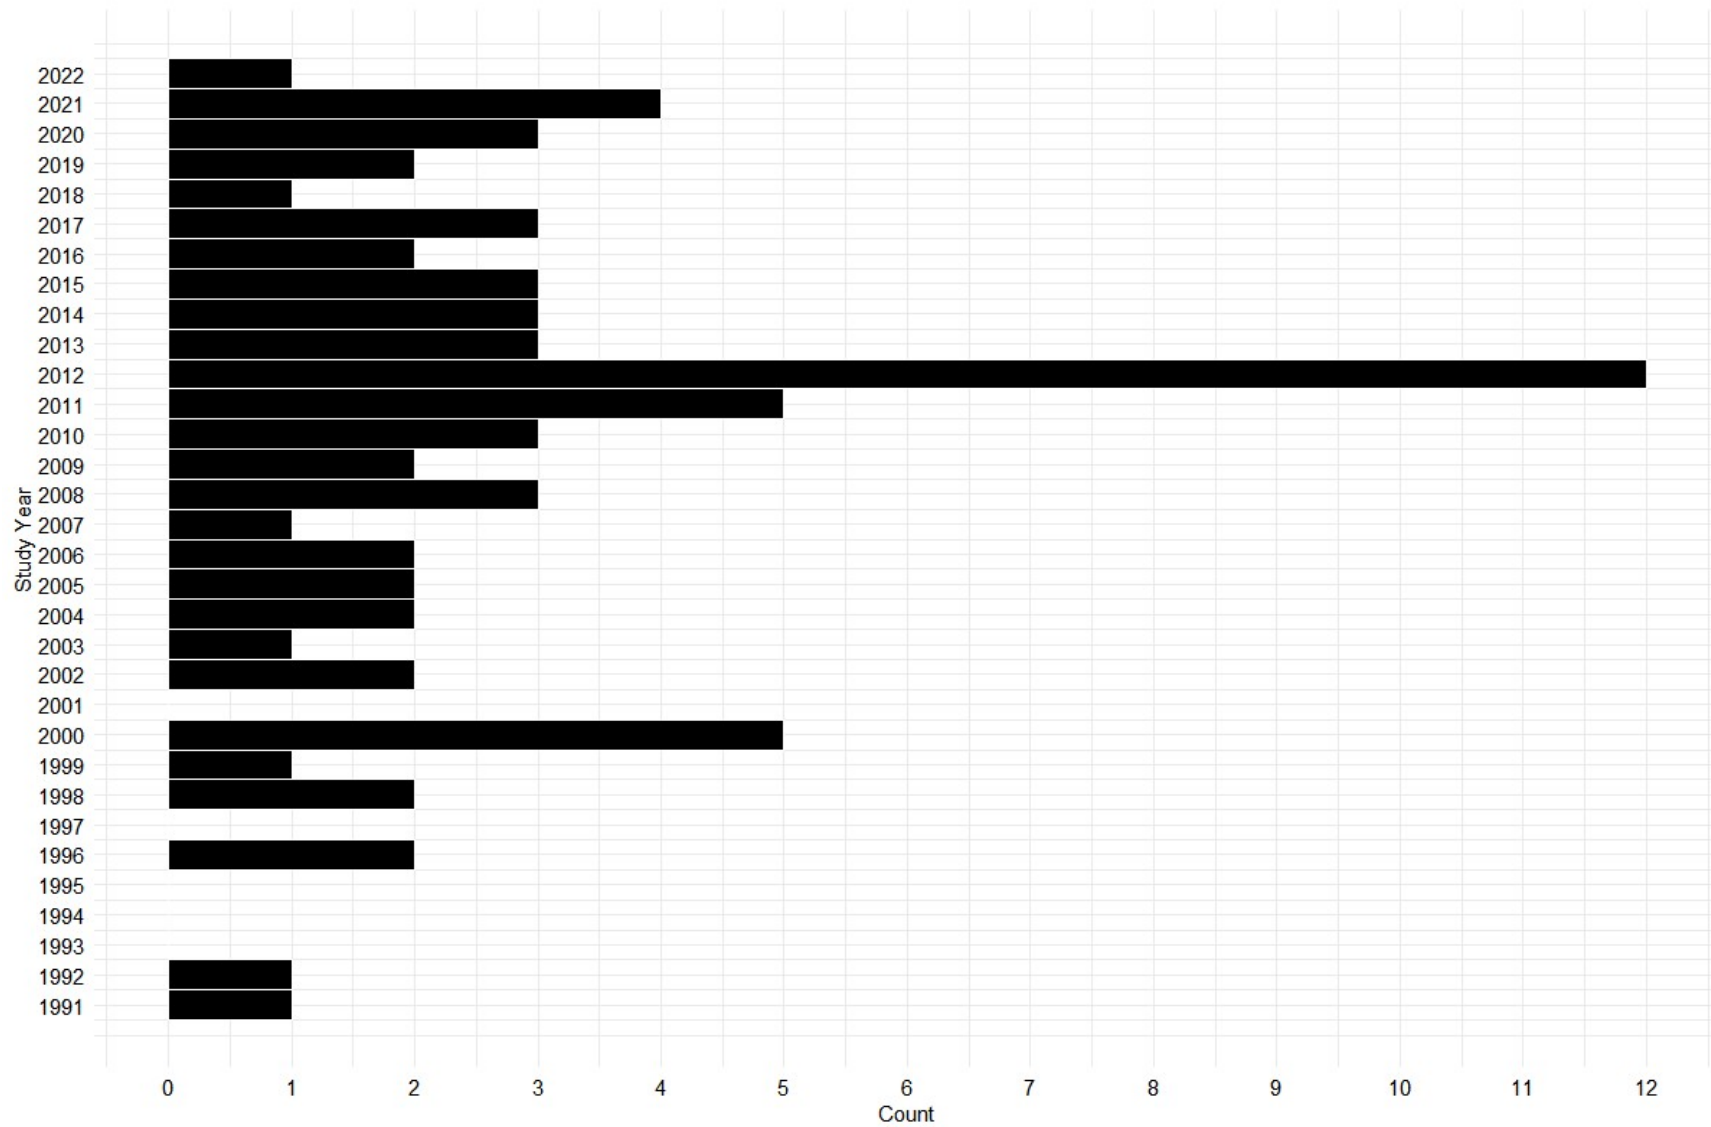

Supplement: Supplementary file 3 [file 1]
